# Supplementary material
Source: publisher figshare collection journal article supplement (https://diabetesjournals.figshare.com/ndownloader/files/31149982)
Supplement: Supplementary file 1 [file 31149982]

## SUPPLEMENTARY FIGURES AND TABLES

Figure S1: Cohort derivation flowchart

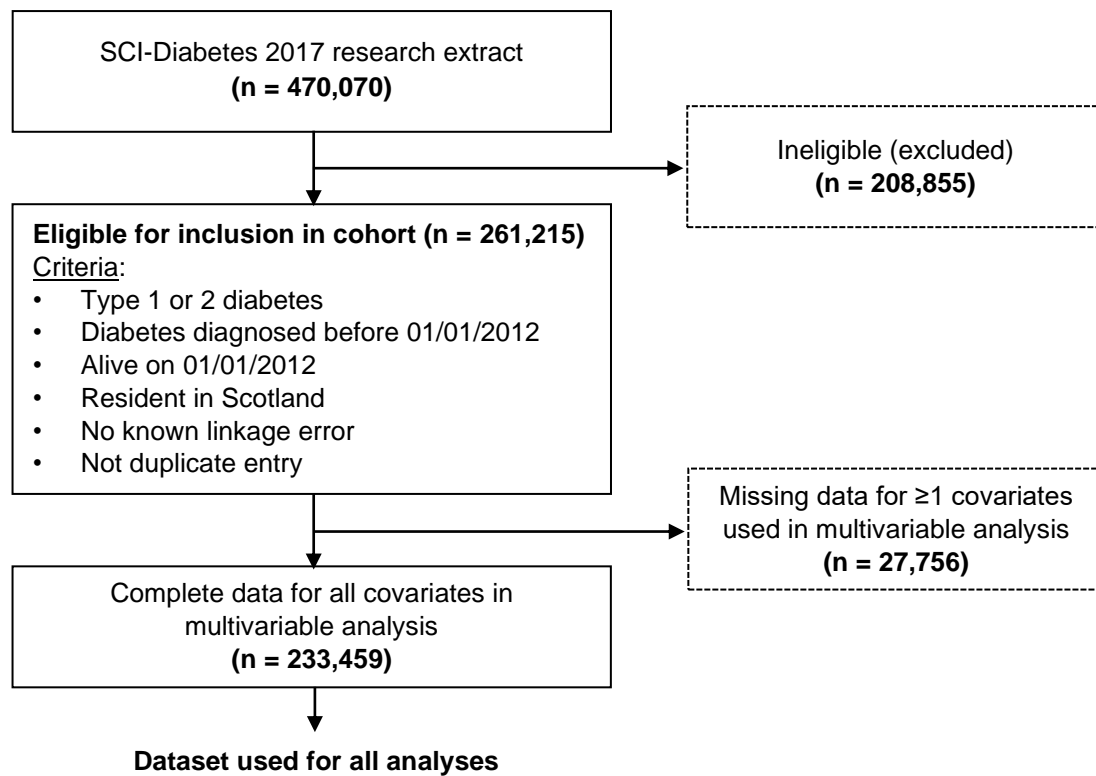

**Figure S2: Log cumulative hazard plot for amputation-free survival**

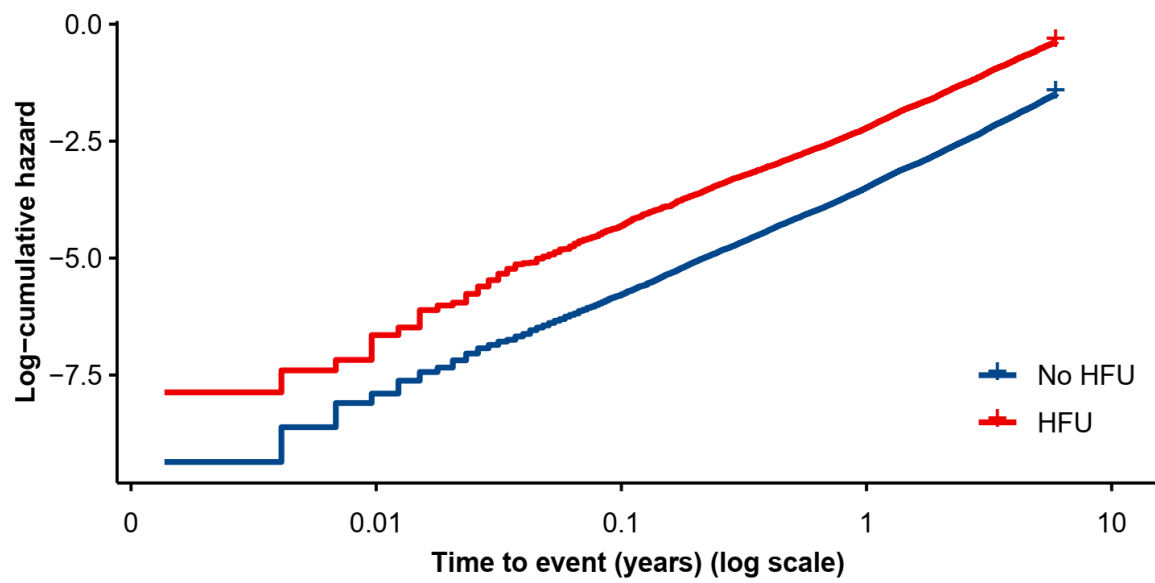

## Supplementary Table S1. Codes used to identify foot ulcers and co-morbidities.

### Foot ulcer

#### ICD codes for foot ulcer

| ICD-9 code         | Description                                                             |
|--------------------|-------------------------------------------------------------------------|
| 707.1              | Ulcer of lower limb, except decubitus                                   |
| ICD-10 code        | Description                                                             |
| E10.5 <sup>1</sup> | Type 1 diabetes mellitus with peripheral circulatory complications      |
| E11.5 <sup>1</sup> | Type 2 diabetes mellitus with peripheral circulatory complications      |
| E14.5 <sup>1</sup> | Unspecified diabetes mellitus with peripheral circulatory complications |
| L97                | Ulcer of lower limb, not elsewhere classified                           |

#### Legend:

<sup>1</sup>. Codes marked with a dagger (†) are excluded because † indicates pairing with asterix codes for peripheral angiopathy (I79.2\*).

*Abbreviations: ICD-9, International Classification of Diseases, version 9; ICD-10, International Classification of Diseases, version 10.*

### IHD

#### ICD codes for ischaemic heart disease

| ICD-9 code                              | Description                                                         |
|-----------------------------------------|---------------------------------------------------------------------|
| 410-414                                 | Ischaemic heart diseases                                            |
| 410 (all sub-codes i.e. .9)             | Acute myocardial infarction                                         |
| 411 (all sub-codes i.e. .9)             | Other acute and subacute forms of ischaemic heart disease           |
| 412 (all sub-codes i.e. .9)             | Old myocardial infarction                                           |
| 413 (all sub-codes i.e. .9)             | Angina pectoris                                                     |
| 414 (all sub-codes i.e. .0, .1, .8, .9) | Other forms of chronic ischaemic heart disease                      |
| ICD-10 code                             | Description                                                         |
| I20-I25                                 | Ischaemic heart diseases                                            |
| I20 (all sub-codes i.e. .0, .1, .8, .9) | Angina pectoris                                                     |
| I21 (all sub-codes i.e. .0-4, .9, .X)   | Acute myocardial infarction                                         |
| I22 (all sub-codes i.e. .0, .1, .8, .9) | Subsequent myocardial infarction                                    |
| I23 (all sub-codes i.e. .0-6, .8)       | Certain current complications following acute myocardial infarction |
| I24 (all sub-codes i.e. .0, .1, .8, .9) | Other acute ischaemic heart diseases                                |
| I25 (all sub-codes i.e. .0-6, .8, .9)   | Chronic ischaemic heart disease                                     |

Legend:

Diagnoses in primary or secondary positions were all included.

Abbreviations: ICD-9, International Classification of Diseases, version 9; ICD-9, International Classification of Diseases, version 10.

**OPCS codes for coronary revascularisation and stenting (i.e. indicate IHD)**

| <b>OPCS-3 code</b>                     | <b>Description</b>                                                                        |
|----------------------------------------|-------------------------------------------------------------------------------------------|
| 304.1                                  | Operations affecting myocardium: coronary endarterectomy                                  |
| 304.2                                  | Operations affecting myocardium: revascularization (poudrage)                             |
| 304.3                                  | Operations affecting myocardium: coronary anastomosis or graft                            |
| <b>OPCS-4 code</b>                     | <b>Description</b>                                                                        |
| K40 (all subcodes i.e. .1-.4, .8, .9)  | Saphenous vein graft replacement of coronary artery                                       |
| K41 (all subcodes i.e. .1-.4, .8, .9)  | Other autograft replacement of coronary artery                                            |
| K42 (all subcodes i.e. .1-.4, .8, .9)  | Allograft replacement of coronary artery                                                  |
| K43 (all subcodes i.e. .1-.4, .8, .9)  | Prosthetic replacement of coronary artery                                                 |
| K44 (all subcodes i.e. .1, .2, .8, .9) | Other replacement of coronary artery                                                      |
| K45 (all subcodes i.e. .1-.6, .8, .9)  | Connection of thoracic artery to coronary artery                                          |
| K46 (all subcodes i.e. .1-.5, .8, .9)  | Other bypass of coronary artery                                                           |
| K49 (all subcodes i.e. .1-.4, .8, .9)  | Transluminal balloon angioplasty of coronary artery                                       |
| K50.1                                  | Percutaneous transluminal laser coronary angioplasty                                      |
| K50.8                                  | Other specified therapeutic transluminal operations on coronary artery                    |
| K75 (all subcodes i.e. .1-.4, .8, .9)  | Percutaneous transluminal balloon angioplasty and insertion of stent into coronary artery |

Legend:

Diagnoses in primary or secondary positions were all included.

Abbreviations: OPCS-3, OPCS Classification of Interventions and Procedures version 3; OPCS-4, OPCS Classification of Interventions and Procedures version 4.

**PVD**

**ICD codes for peripheral vascular disease**

| <b>ICD-9 code</b>    | <b>Description</b>                                                        |
|----------------------|---------------------------------------------------------------------------|
| 440.2                | Atherosclerosis of arteries of the extremities                            |
| 443.8                | Peripheral angiopathy in diseases classified elsewhere                    |
| 443.9                | Peripheral vascular disease, unspecified                                  |
| 444.2                | Embolism and thrombosis of arteries of the extremities                    |
| <b>ICD-10 code</b>   | <b>Description</b>                                                        |
| I70.2                | Atherosclerosis of arteries of extremities                                |
| I73.9                | Peripheral vascular disease, unspecified                                  |
| I74.3                | Embolism and thrombosis of arteries of the lower extremities              |
| I74.4                | Embolism and thrombosis of arteries of extremities, unspecified           |
| I74.5                | Embolism and thrombosis of iliac artery                                   |
| I79.2 <i>asterix</i> | Peripheral angiopathy in diseases classified elsewhere ( <i>asterix</i> ) |

|                                  |                                                                                           |
|----------------------------------|-------------------------------------------------------------------------------------------|
| E10.5 <i>dagger</i> <sup>1</sup> | Type 1 diabetes mellitus with peripheral circulatory complications ( <i>dagger</i> )      |
| E11.5 <i>dagger</i> <sup>1</sup> | Type 2 diabetes mellitus with peripheral circulatory complications ( <i>dagger</i> )      |
| E14.5 <i>dagger</i> <sup>1</sup> | Unspecified diabetes mellitus with peripheral circulatory complications ( <i>dagger</i> ) |

Legend:

<sup>1</sup>In all records in the cohort where these codes are used, they are paired with I79.2 (asterix) i.e. the complication is specified as peripheral angiopathy. The E1X.5(†) codes therefore do not identify any additional records beyond those already identified by I79.2\*, but are included for completeness.

Diagnoses in primary or secondary positions were all included.

*Abbreviations: ICD-9, International Classification of Diseases, version 9; ICD-10, International Classification of Diseases, version 10.*

**OPCS codes for procedures indicating peripheral vascular disease**

| <b>OPCS-3 code</b>                    | <b>Description</b>                                                    |
|---------------------------------------|-----------------------------------------------------------------------|
| 884                                   | Repair of artery                                                      |
| 884.1                                 | Repair of artery: by-pass graft (vein)                                |
| 884.2                                 | Repair of artery: repair by tissue graft, not elsewhere classified    |
| 884.3                                 | Repair of artery: repair by prosthesis                                |
| 884.4                                 | Repair of artery: excision with re-anastomosis                        |
| 887                                   | Arterial catheterization, not elsewhere classified                    |
| 889.2                                 | Other operations on arteries: revision of previous vascular operation |
| <b>OPCS-4 code</b>                    | <b>Description</b>                                                    |
| L50 (all subcodes i.e. .1-.6, .8, .9) | Other emergency bypass of iliac artery                                |
| L51 (all subcodes i.e. .1-.6, .8, .9) | Other bypass of iliac artery                                          |
| L52 (all subcodes i.e. .1-.2, .8, .9) | Reconstruction of iliac artery                                        |
| L53.1                                 | Repair of iliac artery NEC                                            |
| L54.1                                 | Percutaneous transluminal angioplasty of iliac artery                 |
| L54.4                                 | Percutaneous transluminal insertion of stent into iliac artery        |
| L58 (all subcodes i.e. .1-.9)         | Other emergency bypass of femoral artery                              |
| L59 (all subcodes i.e. .1-.9)         | Other bypass of femoral artery                                        |
| L60 (all subcodes i.e. .1-.4, .8,.9)  | Reconstruction of femoral artery                                      |
| L62.1                                 | Repair of femoral artery NEC                                          |
| L62.2                                 | Open embolectomy of femoral artery                                    |
| L62.8                                 | Other specified other open operations on femoral artery               |
| L62.9                                 | Unspecified other open operations on femoral artery                   |
| L63.1                                 | Percutaneous transluminal angioplasty of femoral artery               |

|       |                                                                     |
|-------|---------------------------------------------------------------------|
| L63.2 | Percutaneous transluminal embolectomy of femoral artery             |
| L63.5 | Percutaneous transluminal insertion of stent into femoral artery    |
| L63.8 | Other specified transluminal operations on femoral artery           |
| L63.9 | Unspecified transluminal operations on femoral artery               |
| L65.2 | Revision of reconstruction involving iliac artery                   |
| L65.3 | Revision of reconstruction involving femoral artery                 |
| L66.1 | Percutaneous transluminal arterial thrombolysis and reconstruction  |
| L66.2 | Percutaneous transluminal stent reconstruction of artery            |
| L66.5 | Percutaneous transluminal balloon angioplasty of artery             |
| L66.7 | Percutaneous transluminal placement of peripheral stent in artery   |
| L66.8 | Other specified other therapeutic transluminal operations on artery |
| L66.9 | Unspecified other therapeutic transluminal operations on artery     |

Legend:

Diagnoses in primary or secondary positions were all included.

Abbreviations: NEC, Not Elsewhere Classified; OPCS-3, OPCS Classification of Interventions and Procedures version 3; OPCS-4, OPCS Classification of Interventions and Procedures version 4.

**Stroke**

**ICD codes for stroke**

| ICD-9 code                            | Description                                        |
|---------------------------------------|----------------------------------------------------|
| 430 (all subcodes i.e. .9)            | Subarachnoid haemorrhage                           |
| 431 (all subcodes i.e. .9)            | Intracerebral haemorrhage                          |
| 434 (all subcodes i.e. .0, .1, .9)    | Occlusion of cerebral arteries                     |
| 436 (all subcodes i.e. .9)            | Acute, ill-defined cerebrovascular disease         |
| ICD-10 code                           | Description                                        |
| I60 (all subcodes i.e. .0-.9)         | Subarachnoid haemorrhage                           |
| I61 (all subcodes i.e. .0-.6, .8, .9) | Intracerebral haemorrhage                          |
| I63 (all subcodes i.e. .0-.6, .8, .9) | Cerebral infarction                                |
| I64                                   | Stroke, not specified as haemorrhage or infarction |

Legend:

Diagnoses in primary or secondary positions were all included.

Abbreviations: ICD-9, International Classification of Diseases, version 9; ICD-10, International Classification of Diseases, version 10.

**End-stage renal failure**

**ICD codes for end-stage renal failure**

| End-stage renal failure |                         |
|-------------------------|-------------------------|
| ICD-10 code             | Description             |
| N18.0                   | End-stage renal disease |

|       |                                 |
|-------|---------------------------------|
| N18.5 | Chronic kidney disease, stage 5 |
|-------|---------------------------------|

### ICD and OPCS codes indicating renal dialysis

| Renal dialysis                         |                                                                      |
|----------------------------------------|----------------------------------------------------------------------|
| ICD-10 code                            | Description                                                          |
| Z49 (all subcodes i.e. .0-.2)          | Care involving dialysis                                              |
| OPCS-3 code                            | Description                                                          |
| 950.3                                  | Other vascular procedures: haemodialysis                             |
| OPCS-4 code                            | Description                                                          |
| X40 (all subcodes i.e. .1-.9)          | Compensation for renal failure                                       |
| X41 (all subcodes i.e. .1, .2, .8, .9) | Placement of ambulatory apparatus for compensation for renal failure |
| X42 (all subcodes i.e. .1, .8, .9)     | Placement of other apparatus for compensation for renal failure      |

#### Legend:

Diagnoses in primary or secondary positions were all included.

No sufficiently specific ICD-9 codes available.

*Abbreviations: ICD-9, International Classification of Diseases, version 9; ICD-10, International Classification of Diseases, version 10; OPCS-3, OPCS Classification of Interventions and Procedures version 3; OPCS-4, OPCS Classification of Interventions and Procedures version 4.*

### Lower limb amputation

#### OPCS-4 and OPCS-3 codes for amputations of the leg, foot or toe (i.e. to include)

| OPCS-3 code                          | Description                       |
|--------------------------------------|-----------------------------------|
| <b>Major amputation</b>              |                                   |
| 870                                  | Removal of lower limb             |
| 871 (all subcodes i.e. .1-.4)        | Amputation through thigh          |
| 872                                  | Disarticulation at knee           |
| 873                                  | Amputation through lower leg      |
| 874                                  | Amputation of foot                |
| <b>Minor amputation</b>              |                                   |
| 875 (all subcodes i.e. .1, .2, .5)   | Amputation of toe                 |
| OPCS-4 code                          | Description                       |
| <b>Major amputation</b>              |                                   |
| X09 (all subcodes, as listed below:) | Amputation of leg                 |
| X091                                 | Hindquarter amputation            |
| X092                                 | Disarticulation of hip            |
| X093                                 | Amputation of leg above knee      |
| X094                                 | Amputation of leg through knee    |
| X095                                 | Amputation of leg below knee      |
| X098                                 | Other specified amputation of leg |
| X099                                 | Unspecified amputation of leg     |
| X10                                  | Amputation of foot                |
| X101                                 | Amputation of foot through ankle  |
| <b>Minor amputation</b>              |                                   |
| X102                                 | Disarticulation of tarsal bones   |

|                                      |                                     |
|--------------------------------------|-------------------------------------|
| X103                                 | Disarticulation of metatarsal bones |
| X104                                 | Amputation through metatarsal bones |
| X108                                 | Other specified amputation of foot  |
| X109                                 | Unspecified amputation of foot      |
| X11 (all subcodes, as listed below:) | Amputation of toe                   |
| X111                                 | Amputation of great toe             |
| X112                                 | Amputation of phalanx of toe        |
| X118                                 | Other specified amputation of toe   |
| X119                                 | Unspecified amputation of toe       |

Legend:

Diagnoses in primary or secondary positions were all included.

*Abbreviations: OPCS-3, OPCS Classification of Interventions and Procedures version 3; OPCS-4, OPCS Classification of Interventions and Procedures version 4.*

**ICD codes for traumatic amputation of the leg, foot or toe (i.e. to exclude)**

| <b>ICD-9 code</b>                  | <b>Description</b>                                                    |
|------------------------------------|-----------------------------------------------------------------------|
| 895 (all subcodes i.e. .0, .1)     | Traumatic amputation of toe(s) (complete) (partial)                   |
| 896 (all subcodes i.e. .0-.3)      | Traumatic amputation of foot (complete) (partial)                     |
| 897 (all subcodes i.e. .0-.7)      | Traumatic amputation of leg(s) (complete) (partial)                   |
| <b>ICD-10 code</b>                 | <b>Description</b>                                                    |
| S78 (all subcodes i.e. .0, .1, .9) | Traumatic amputation of hip and thigh                                 |
| S88 (all subcodes i.e. .0, .1, .9) | Traumatic amputation of lower limb                                    |
| S98 (all subcodes i.e. .0-.4)      | Traumatic amputation of ankle and foot                                |
| T05.3                              | Traumatic amputation of both feet                                     |
| T05.4                              | Traumatic amputation of 1 foot and other leg (any level, except foot) |
| T05.5                              | Traumatic amputation of both legs (any level)                         |
| T13.6                              | Traumatic amputation of lower limb, level unspecified                 |

Legend:

Diagnoses in primary or secondary positions were all included.

*Abbreviations: ICD-9, International Classification of Diseases, version 9; ICD-10, International Classification of Diseases, version 10.*
